# Supplementary figures and images for: CSF2-dependent monocyte education in the pathogenesis of ANCA-induced glomerulonephritis
Source: PubMed Central journal article supplement — Ann Rheum Dis. 2022 Apr 13;81(8):1162–72. doi: 10.1136/annrheumdis-2021-221984 (PMC9279749; doi:10.1136/annrheumdis-2021-221984), 2022-04-13

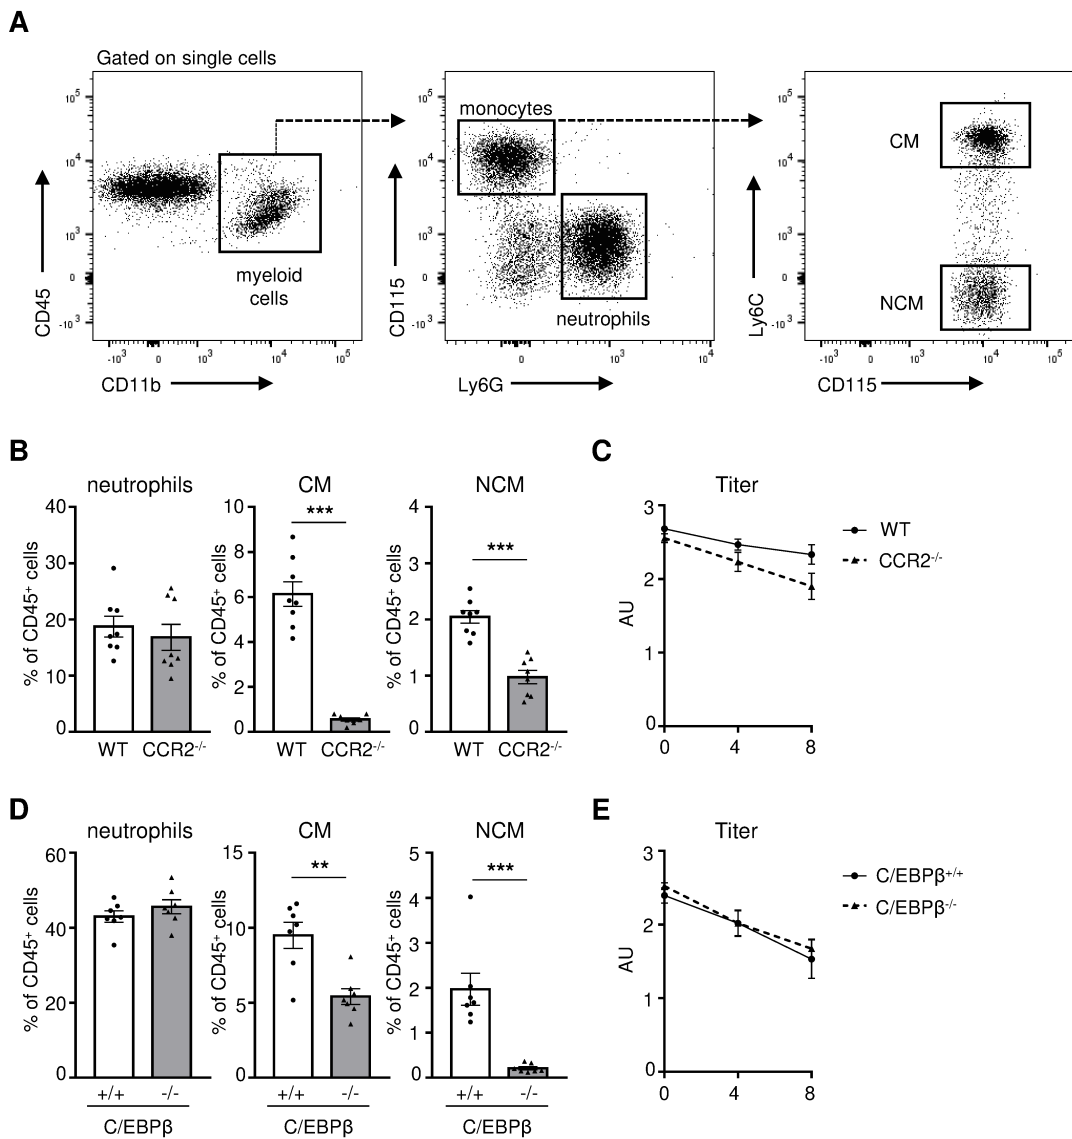

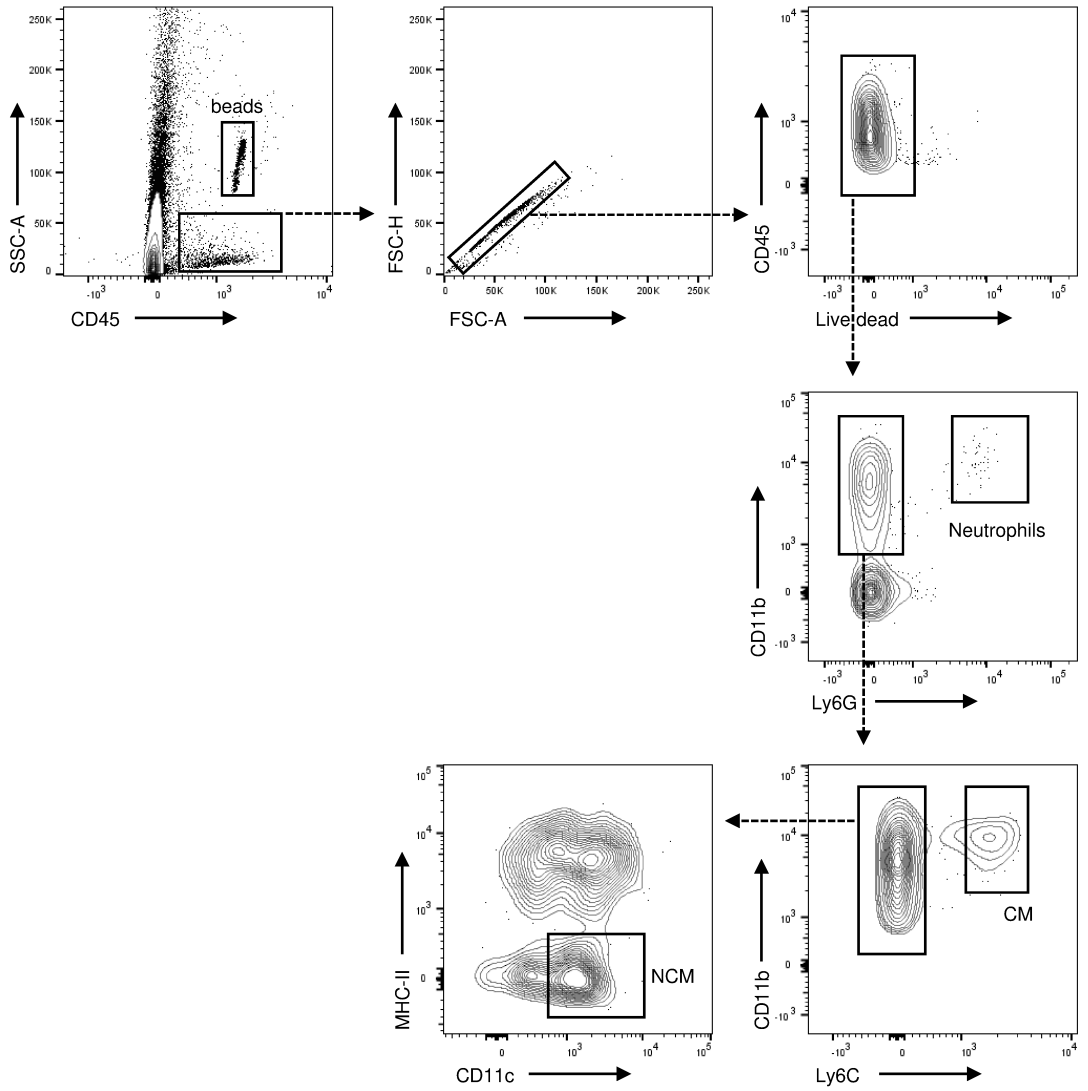

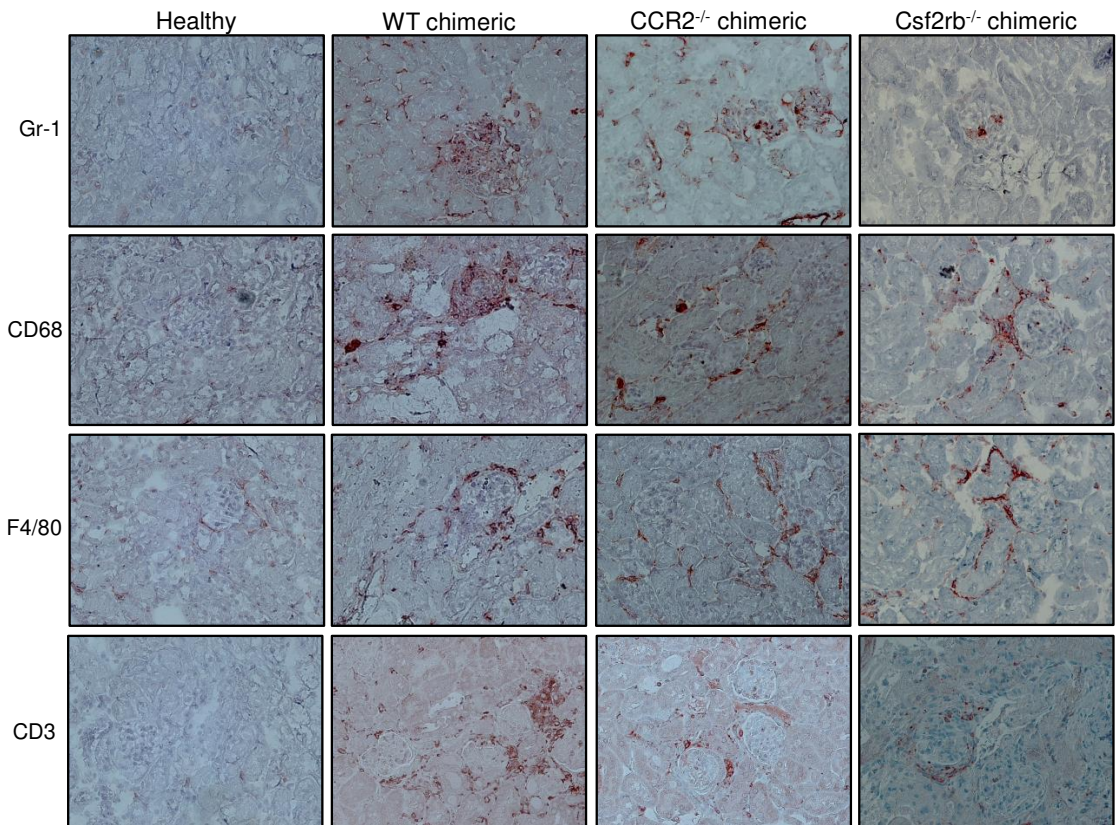

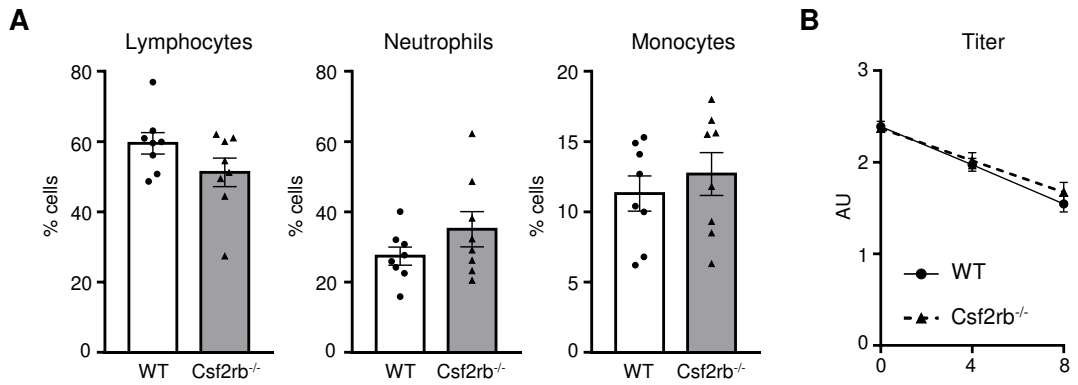

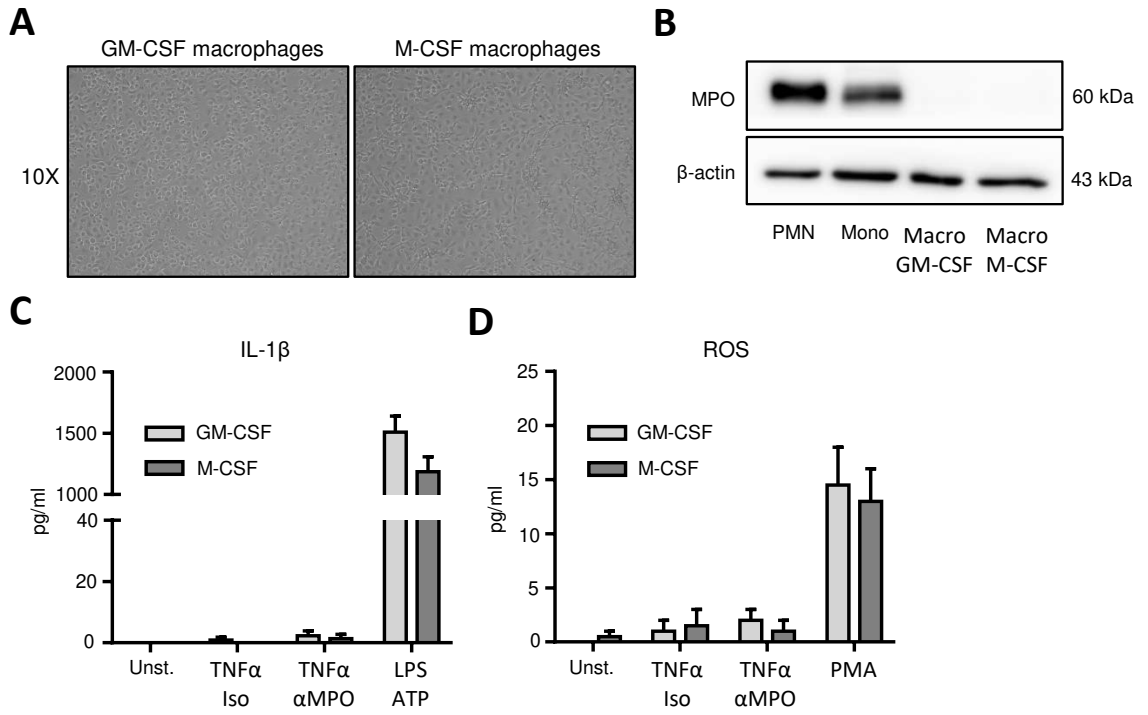

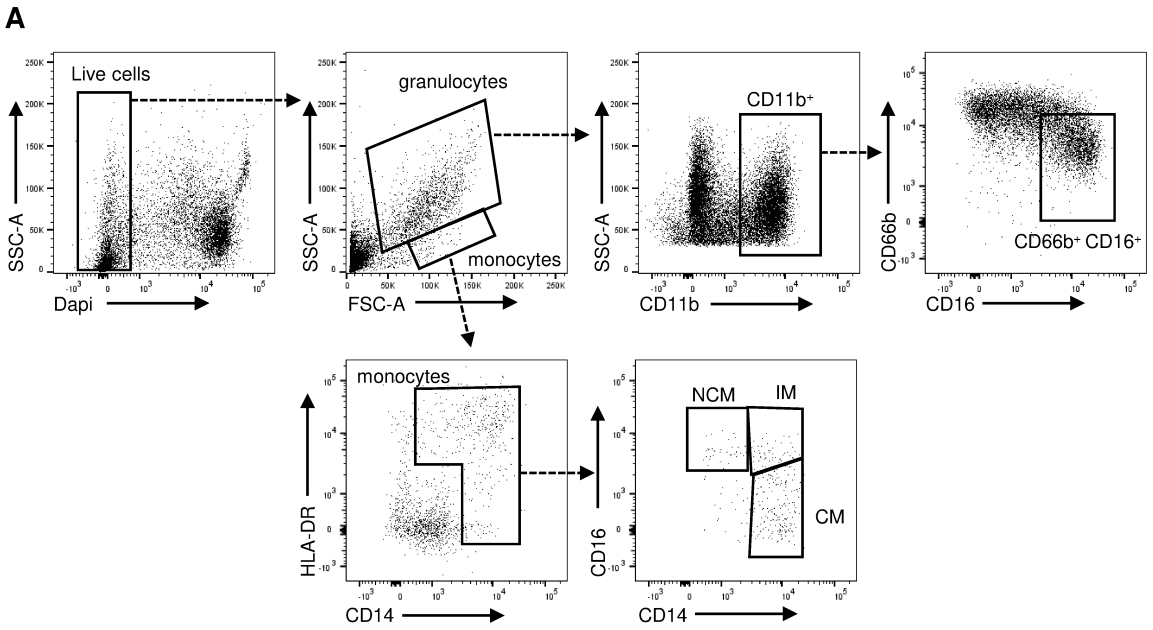

Supplement: annrheumdis-2021-221984supp001.pdf [file annrheumdis-2021-221984supp001.pdf]
